# Supplementary material
Source: PubMed Central journal article supplement (PMC6829047)
Supplement: NIHMS1520993-supplement-1.pdf [file NIHMS1520993-supplement-1.pdf]

**Supplementary Table 1. Some Medications Associated with Constipation**

| <b>Class</b>                                       | <b>Examples</b>                                         |
|----------------------------------------------------|---------------------------------------------------------|
| 5-HT <sub>3</sub> -receptor antagonists            | ondansetron                                             |
| Analgesics                                         |                                                         |
| Opiates <sup>1</sup>                               | morphine                                                |
| Nonsteroidal anti-inflammatory agents <sup>†</sup> | ibuprofen                                               |
| Anticholinergic agents                             | librax, belladonna                                      |
| Tricyclic antidepressants <sup>1</sup>             | amitriptyline > nortriptyline                           |
| Antiparkinsonian drugs                             | benzotropine                                            |
| Antipsychotics                                     | chlorpromazine                                          |
| Antispasmodics <sup>1</sup>                        | dicyclomine                                             |
| Antihistamines <sup>1</sup>                        | diphenhydramine                                         |
| Anticonvulsants <sup>1</sup>                       | carbamazepine                                           |
| Antihypertensives                                  |                                                         |
| Calcium channel blockers                           | verapamil, nifedipine                                   |
| Diuretics <sup>1,2</sup>                           | furosemide                                              |
| Centrally acting                                   | clonidine                                               |
| Antiarrhythmics                                    | amiodarone                                              |
| Beta-adrenoceptor antagonist                       | atenolol                                                |
| Bile acid sequestrants                             | cholestyramine, colestipol                              |
| Cation-containing agents                           |                                                         |
| Aluminum <sup>1</sup>                              | antacids, sucralfate                                    |
| Calcium                                            | antacids, supplements                                   |
| Bismuth                                            |                                                         |
| Iron supplements                                   | ferrous sulfate                                         |
| Lithium                                            |                                                         |
| Chemotherapy agents                                |                                                         |
| Vinca alkaloids                                    | vincristine                                             |
| Alkylating agents                                  | cyclophosphamide                                        |
| Miscellaneous compounds                            | barium sulfate, oral contraceptives, polystyrene resins |
| Endocrine medications                              | pamidronate and alendronic acid                         |
| Other antidepressants                              | monoamine oxidase inhibitors                            |
| Other antipsychotics                               | clozapine, haloperidol, risperidone                     |
| Other antiparkinsonian drugs                       | dopamine agonists                                       |
| Other antispasmodics                               | mebeverine, peppermint oil                              |
| Sympathomimetics                                   | ephedrine, terbutaline                                  |

<sup>1</sup> Drugs associated with constipation in community-based studies <sup>1,2</sup>

<sup>2</sup> Perhaps related to electrolyte disturbances

5-HT, 5-hydroxytryptamine

## Supplementary Table 2. Medical Conditions Associated With Constipation

### ***Drug effects***

See Supplementary Table 1

### ***Mechanical obstruction***

Colon cancer  
External compression from malignant lesion  
Strictures: diverticular or postischemic  
Rectocele (some)

### ***Metabolic conditions***

Diabetes mellitus  
Hypothyroidism (severe)  
Hypercalcemia(severe)  
Hypokalemia  
Hypomagnesemia  
  
Heavy metal poisoning

### ***Myopathies***

Amyloidosis  
Scleroderma

### ***Neuropathies***

*Parkinson's disease*  
*Spinal cord injury or tumor*  
Cerebrovascular disease  
*Multiple sclerosis*

### ***Other Conditions***

Depression  
Autonomic neuropathy  
*Cognitive impairment*  
*Immobility*

Conditions that are frequently encountered in clinical practice and associated with constipation are identified in italics.

Adapted from *Gastroenterology*,<sup>3</sup> with permission.

**Supplementary Table 3. Treatments for Opioid-Induced Constipation**

| Drug              | Receptor antagonism |    |    | Permeable to blood brain barrier | Dose                                  | NNT (95% CI)               | Wholesale cost/month* |
|-------------------|---------------------|----|----|----------------------------------|---------------------------------------|----------------------------|-----------------------|
|                   | M                   | K  | δ  |                                  |                                       |                            |                       |
| Methyl-naltrexone | +++                 | ++ | ++ | No                               | 12 mg EOD (oral);<br>8-12 mg QOD (SC) | 3.4 (3 – 6) <sup>121</sup> | \$1807.35             |
| Naloxegol         | +++                 | -  | -  | No                               | 25 mg QD                              | 7 (4 - 26) <sup>121</sup>  | \$ 324.30             |
| Naldemedine       | +++                 | -  | -  | No                               | 0.2 mg QD                             | 5 (4 – 8) <sup>121</sup>   | \$ 280.50             |
| Lubiprostone      | NA                  | NA | NA | NA                               | 24 mcg bid                            | 15 (9 - 51) <sup>121</sup> | \$ 445.32             |

\*Courtesy of Dr Michael Hirsch, Department of Pharmacy, University of Wisconsin Hospitals, Madison.

**References:**

1. Talley NJ, Fleming KC, Evans JM, et al. Constipation in an elderly community: a study of prevalence and potential risk factors. *Am J Gastroenterol.* 1996;91:19-25.
2. Talley NJ, Jones M, Nuyts G, et al. Risk factors for chronic constipation based on a general practice sample. *Am J Gastroenterol.* 2003;98:1107-1111.
3. Locke GR III, Pemberton JH, Phillips SF. AGA Technical Review on Constipation. *Gastroenterology.* 2000;119( 6):1766-1778.
